# Supplementary material for: Anti-Algics in the Therapeutic Response of Breast and Urological Cancers
Source: MDPI journal article supplement (doi:10.3390/ijms25010468), 2023-12-29

# Supplementary Materials

**Table S1** Selectivity index (SI) values.

| Tumoral cell lines                | Normal cell lines                  |                                   |                                    |
|-----------------------------------|------------------------------------|-----------------------------------|------------------------------------|
| Lidocaine                         |                                    |                                   |                                    |
|                                   | MCF12A (IC <sub>50</sub> =2,69 mM) | HaCaT (IC <sub>50</sub> =2,55 mM) | RWPE-1 (IC <sub>50</sub> =4,35 mM) |
| MCF-7 (IC <sub>50</sub> =1,16 mM) | 2,3                                | 2,2                               | *                                  |
| PC3 (IC <sub>50</sub> =3,17 mM)   | *                                  | *                                 | 1,4                                |
| LNCaP (IC <sub>50</sub> =1,74 mM) | *                                  | *                                 | 2,5                                |
| Ropivacaine                       |                                    |                                   |                                    |
|                                   | MCF12A (IC <sub>50</sub> =0,86 mM) | HaCaT (IC <sub>50</sub> =0,90 mM) | RWPE-1(IC <sub>50</sub> >1 mM)     |
| MCF-7 (IC <sub>50</sub> =0,49 mM) | 1,8                                | 1,8                               | *                                  |
| PC3 (IC <sub>50</sub> =0,99 mM)   | *                                  | *                                 | **                                 |
| LNCaP (IC <sub>50</sub> >1 mM)    | *                                  | *                                 | **                                 |
| Levobupivacaine                   |                                    |                                   |                                    |
|                                   | MCF12A (IC <sub>50</sub> =0,40 mM) | HaCaT (IC <sub>50</sub> =0,64 mM) | RWPE-1 (IC <sub>50</sub> =0,86 mM) |
| MCF-7 (IC <sub>50</sub> =0,16 mM) | 2,5                                | 4                                 | *                                  |
| PC3 (IC <sub>50</sub> =0,40 mM)   | *                                  | *                                 | 2,2                                |
| LNCaP (IC <sub>50</sub> =0,56 mM) | *                                  | *                                 | 1,5                                |

\*Normal cell line is not in respect with tumoral cell line; \*\* Maximum concentration tested wasn't enough to obtain IC<sub>50</sub> value

**Table S2** Characterization of Opioid group.

| Opioid Group, N = 62  |           |
|-----------------------|-----------|
|                       | N (%)     |
| <b>Opioid</b>         |           |
| Fentanil              | 34 (54.8) |
| Tramadol              | 12 (19.4) |
| Buprenorfine          | 10 (16.1) |
| Tapentadol            | 5 (8.1)   |
| Hidromorfine          | 1 (1.6)   |
| Missings              | 0 (0.0)   |
| <b>Type of opioid</b> |           |
| Weak                  | 17 (27.4) |
| Strong                | 45 (72.6) |
| Missings              | 0 (0.0)   |
| <b>Exposure time</b>  |           |
| 2 months              | 1 (1.7)   |
| 6 months              | 3 (5.2)   |
| 12 months             | 1 (1.7)   |
| Prolonged             | 53 (91.4) |
| Missings              | 4 (6.5)   |

| Type of administration |           |
|------------------------|-----------|
| Transdermal            | 43 (69.3) |
| Oral                   | 19 (30.7) |
| Missings               | 0 (0.0)   |
| Morphine dosage        |           |
| [0, 60]                | 33 (54.1) |
| > 60                   | 28 (45.9) |
| Missings               | 1 (1.6)   |

**Figure S1.** Dotplots of Annexin/PI staining, representing cell viability and cell death profile assessment.

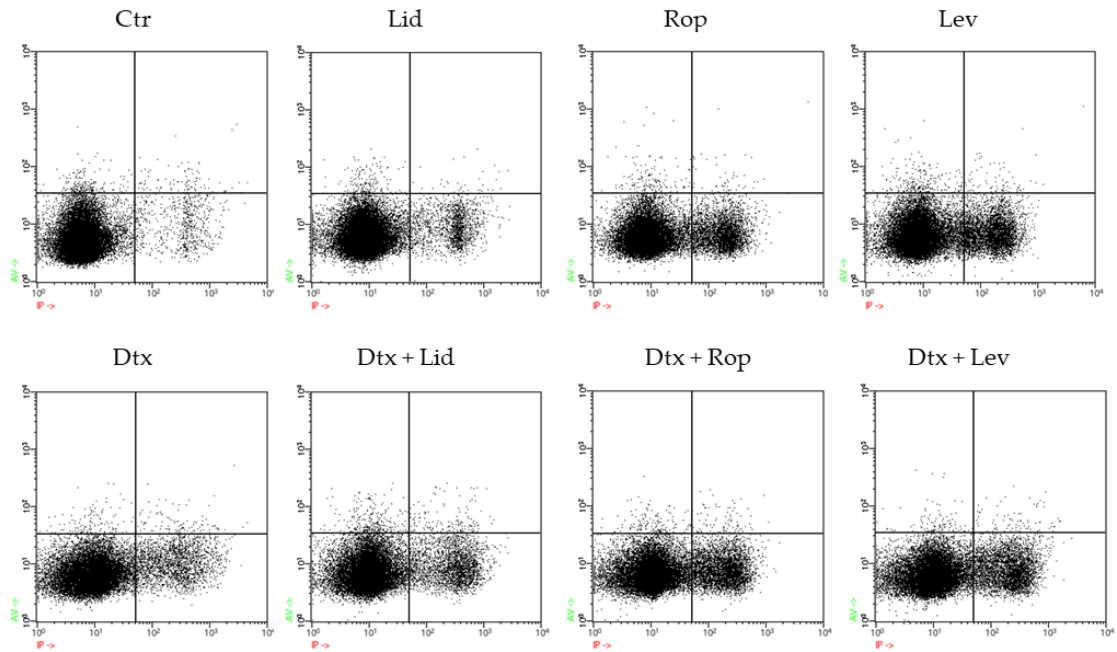

Supplement: s1 [file s1]
